# Supplementary material for: Characterization and Provenance of Carbonate Rocks for Quicklime and Dololime Production in Twin-Shaft Regenerative Kilns from the Arabian Peninsula and Neighboring Countries
Source: MDPI journal article supplement (doi:10.3390/min13121500), 2023-11-29
Supplement: s1 [file s1]

Archive with 1 entries (1 files):
- minerals-2656771-supplementary.pdf
